# Supplementary material for: Artemisia annua L. extract regulates bone-fat metabolism on glucocorticoid-induced osteoporosis via regulating PGC-1α/Nrf2-mediated oxidative stress
Source: Research Square preprint supplement (doi:10.21203/rs.3.rs-4667927/v1), 2024-07-24
Supplement: Supplementary file 1 [file e99f595644c81974353540da.docx]

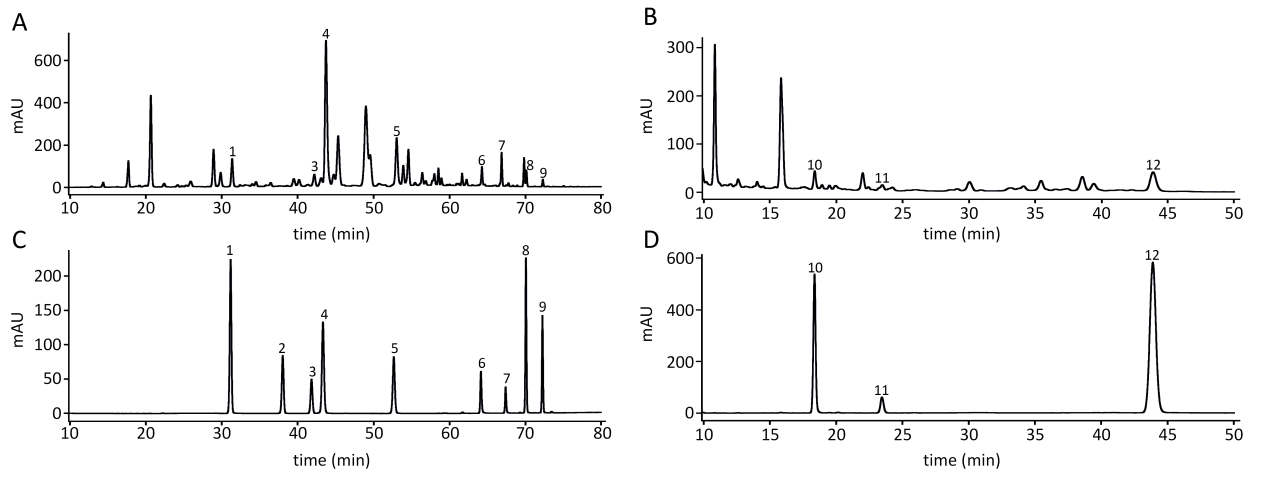


**Fig. S1.** HPLC for AE and reference substances. (A) HPLC of AE at 350 nm, solvent B: methanol. (B) HPLC of AE at 205nm, solvent B: acetonitrile. (C) HPLC of reference substances at 350nm, solvent B: methanol. (D) HPLC of reference substances at 205nm, solvent B: acetonitrile. 1 scopoletin (80 μg/mL), 2 scoparone (18 μg/mL), 3 isochlorogenic acid B (28 μg/mL), 4 isochlorogenic acid A (134 μg/mL), 5 isochlorogenic acid C (52 μg/mL), 6 luteolin (12 μg/mL), 7 apigenin (16 μg/mL), 8 chrysosplenetin (78 μg/mL), 9 artemisetin (37 μg/mL), 10 artemisinin B (400 μg/mL), 11 artemisinin (1850 μg/mL), 12 artemisinic acid (600 μg/mL).


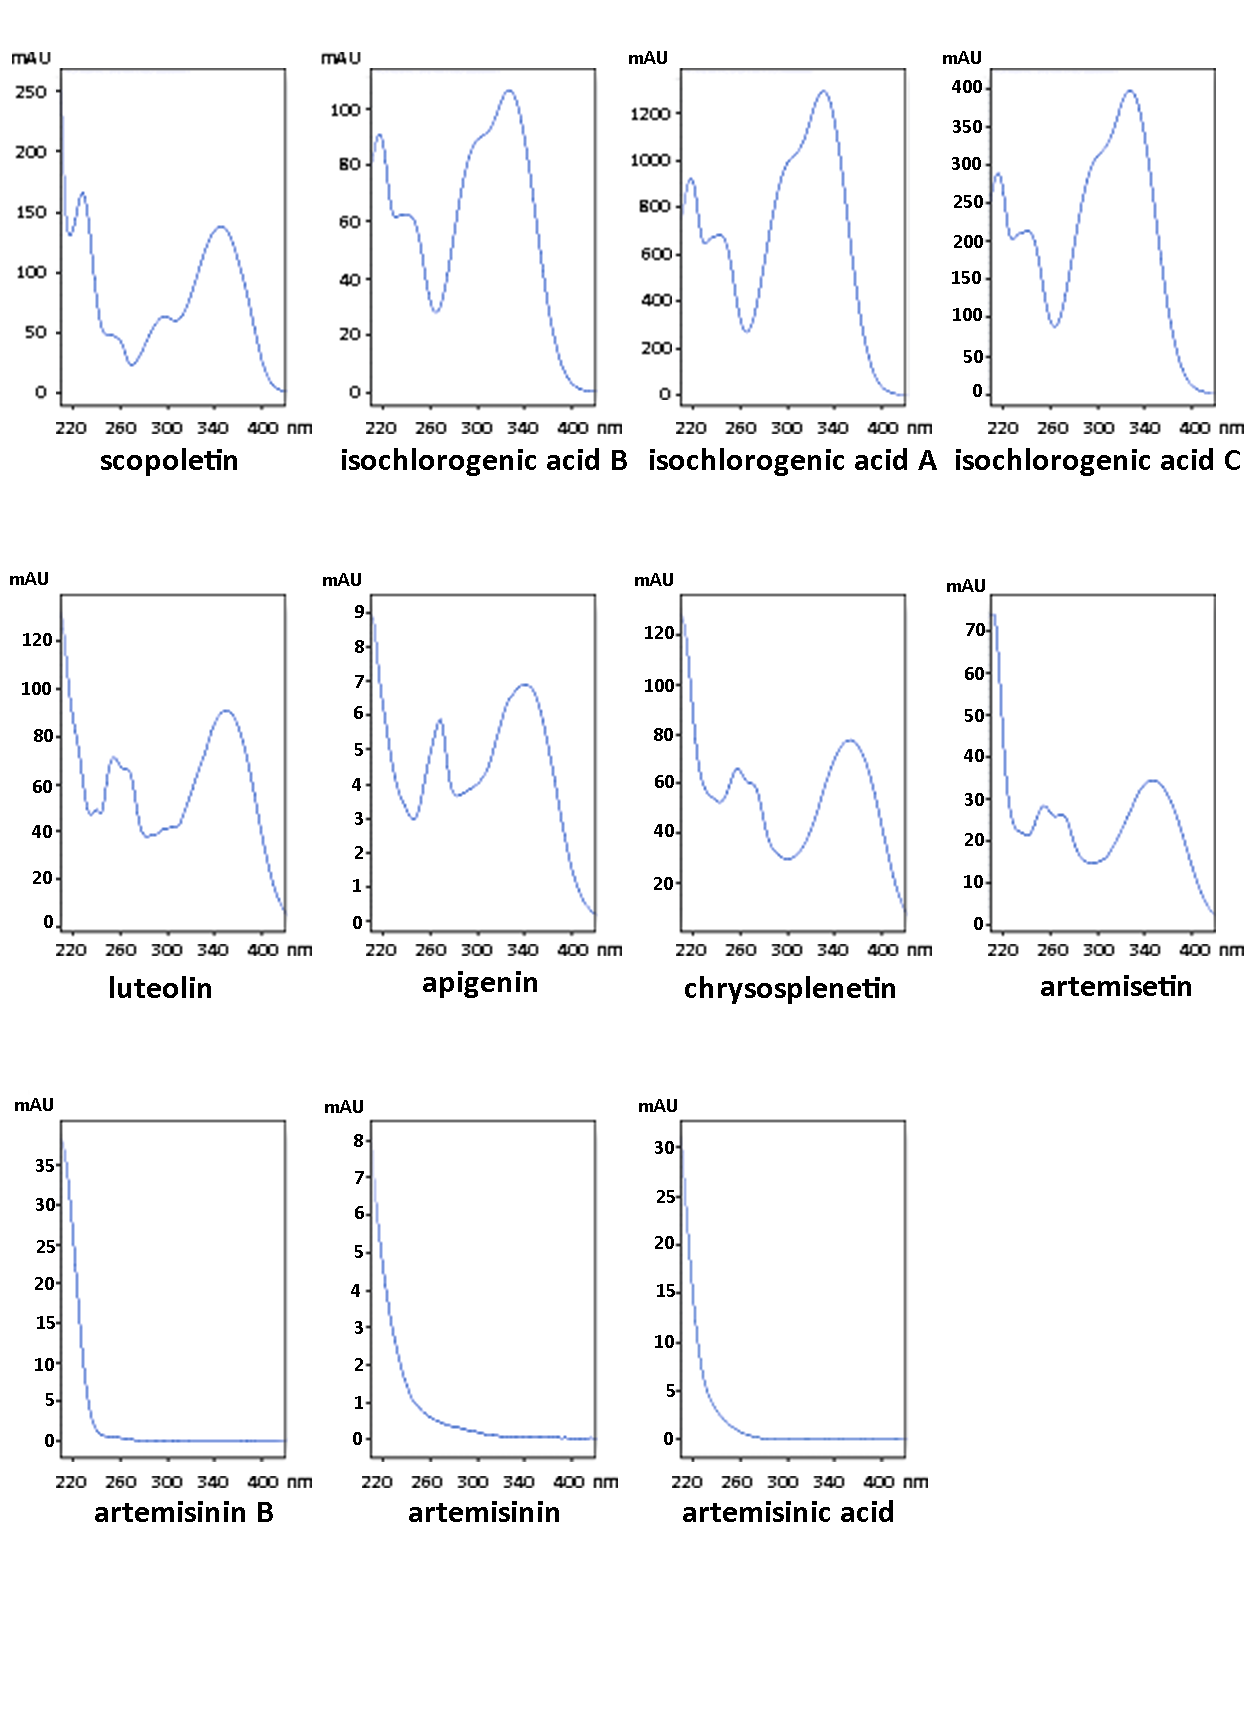


**Fig. S2** Ultraviolet spectrum of 11 constituents in AE.


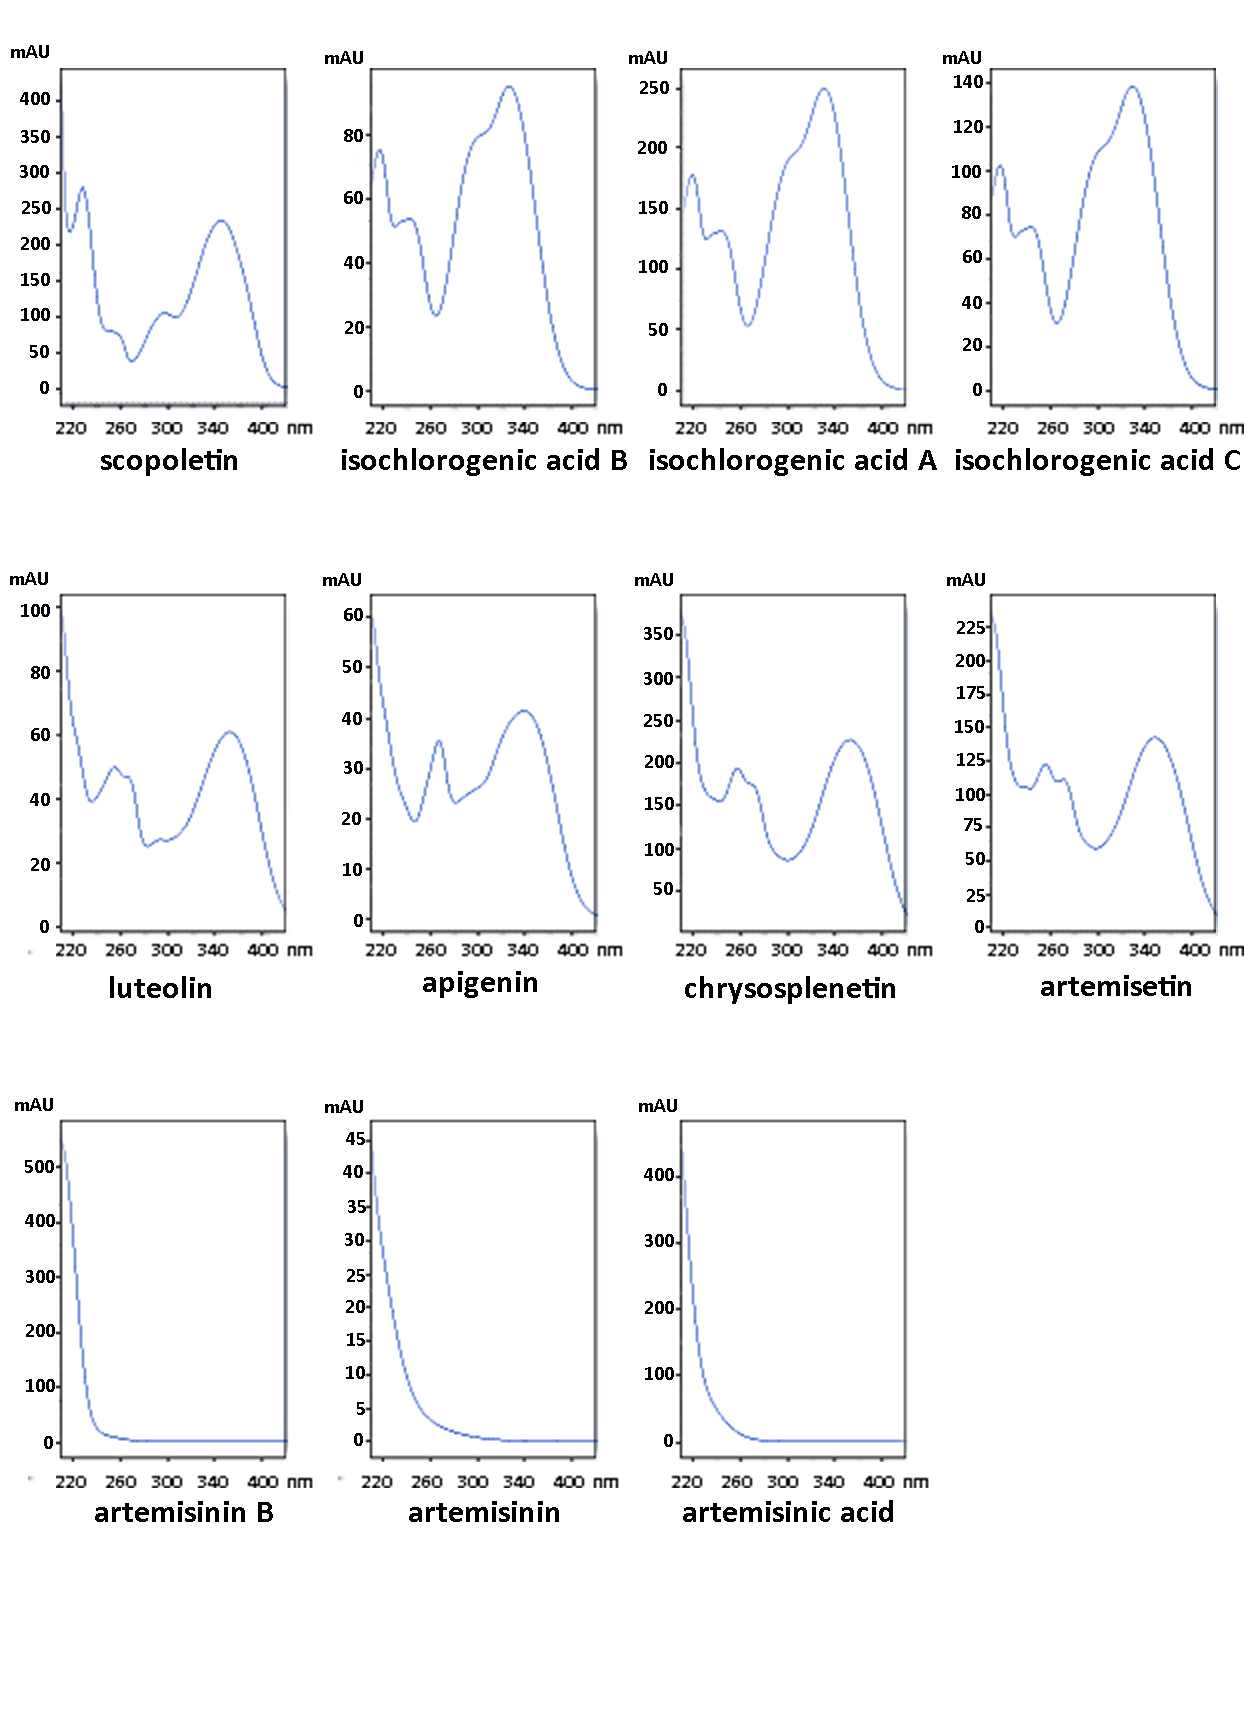


**Fig. S3** Ultraviolet spectrum of 11 constituents in reference substances.
